# Supplementary material
Source: PubMed Central journal article supplement (PMC1636532)
Supplement: pnas_0608461103_2.pdf [file pnas_0608461103_2.pdf]

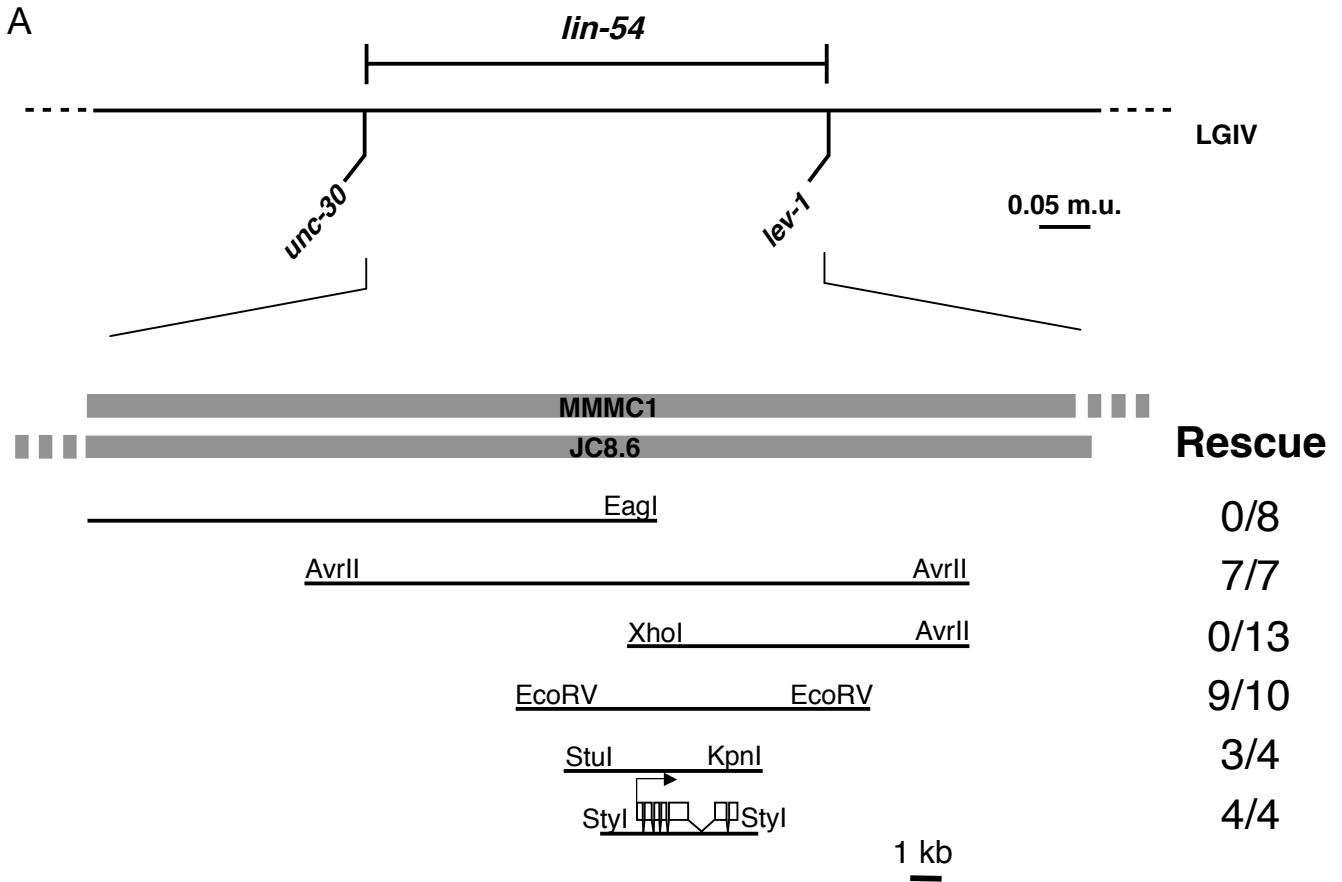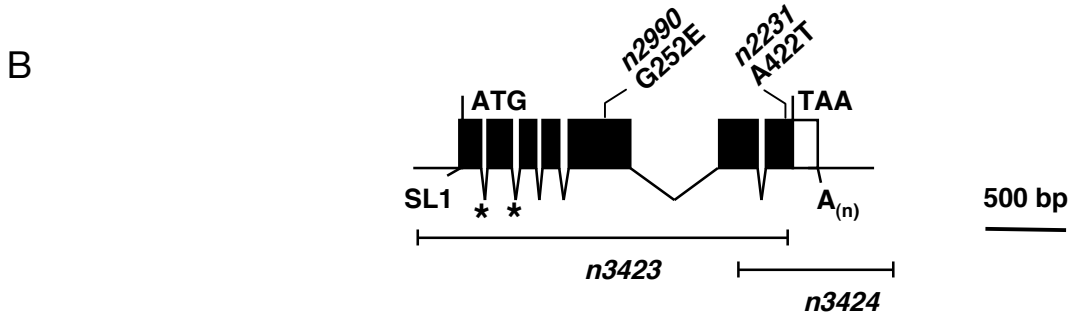

**C**

|                    |     |                                                                                                                                                                                                                                                                      |     |
|--------------------|-----|----------------------------------------------------------------------------------------------------------------------------------------------------------------------------------------------------------------------------------------------------------------------|-----|
| <i>C.e.</i> LIN-54 | 174 | RKPCNC <sup>•</sup> TKSQ <sup>•</sup> CLKLY <sup>•</sup> CD <sup>•</sup> CFANG <sup>•</sup> EFC <sup>•</sup> RD <sup>•</sup> -C <sup>•</sup> NCKD <sup>•</sup> CH <sup>•</sup> NN <sup>•</sup>                                                                       | 210 |
| <i>D.m.</i> Mip120 | 738 | RKHCNCSK <sup>•</sup> SQ <sup>•</sup> CLKLY <sup>•</sup> CD <sup>•</sup> CFANG <sup>•</sup> EFC <sup>•</sup> QD <sup>•</sup> -C <sup>•</sup> TCKDC <sup>•</sup> FNN <sup>•</sup>                                                                                     | 773 |
| <i>G.m.</i> CPP1   | 473 | CKRCNCKK <sup>•</sup> SK <sup>•</sup> CLKLY <sup>•</sup> CD <sup>•</sup> CF <sup>•</sup> AAG <sup>•</sup> TY <sup>•</sup> CTDP <sup>•</sup> CAC <sup>•</sup> QG <sup>•</sup> CLNR <sup>•</sup>                                                                       | 509 |
| <i>H.s.</i> tesmin | 84  | GSTLPGPPKITLAGY <sup>•</sup> CD <sup>•</sup> CFAS <sup>•</sup> GDFC <sup>•</sup> NN <sup>•</sup> -C <sup>•</sup> NC <sup>•</sup> NN <sup>•</sup> CC <sup>•</sup> NN <sup>•</sup>                                                                                     | 120 |
| <i>M.m.</i> tesmin | 264 | GPALQGPPKITLSGY <sup>•</sup> CD <sup>•</sup> CFSS <sup>•</sup> GDFC <sup>•</sup> N <sup>•</sup> S <sup>•</sup> -C <sup>•</sup> SC <sup>•</sup> NNLR <sup>•</sup> HE <sup>•</sup>                                                                                     | 300 |
|                    |     |                                                                                                                                                                                                                                                                      |     |
| <i>C.e.</i> LIN-54 | 250 | QK <sup>•</sup> GCH <sup>•</sup> CK <sup>•</sup> KS <sup>•</sup> GCL <sup>•</sup> KNY <sup>•</sup> CE <sup>•</sup> CY <sup>•</sup> EAK <sup>•</sup> VPC <sup>•</sup> TDR <sup>•</sup> CK <sup>•</sup> CK <sup>•</sup> G <sup>•</sup> CON <sup>•</sup> T <sup>•</sup> | 286 |
| <i>D.m.</i> Mip120 | 811 | NKGCNCKR <sup>•</sup> SGCL <sup>•</sup> KNY <sup>•</sup> CE <sup>•</sup> CY <sup>•</sup> EAK <sup>•</sup> IPC <sup>•</sup> SSI <sup>•</sup> CK <sup>•</sup> CV <sup>•</sup> GCR <sup>•</sup> NM <sup>•</sup>                                                         | 847 |
| <i>G.m.</i> CPP1   | 560 | KRGCNCKR <sup>•</sup> SMCL <sup>•</sup> KY <sup>•</sup> CE <sup>•</sup> CY <sup>•</sup> QAN <sup>•</sup> VC <sup>•</sup> SSG <sup>•</sup> CT <sup>•</sup> CE <sup>•</sup> GCK <sup>•</sup> NV <sup>•</sup>                                                           | 596 |
| <i>H.s.</i> tesmin | 158 | NKGCNCR <sup>•</sup> RS <sup>•</sup> GCL <sup>•</sup> KNY <sup>•</sup> CE <sup>•</sup> CY <sup>•</sup> E <sup>•</sup> QIM <sup>•</sup> CSSI <sup>•</sup> CK <sup>•</sup> CI <sup>•</sup> GCK <sup>•</sup> NY <sup>•</sup>                                            | 194 |
| <i>M.m.</i> tesmin | 334 | SKGCNCKR <sup>•</sup> SGCL <sup>•</sup> KNY <sup>•</sup> CE <sup>•</sup> CY <sup>•</sup> EAK <sup>•</sup> IM <sup>•</sup> CSSI <sup>•</sup> CK <sup>•</sup> CI <sup>•</sup> ACK <sup>•</sup> NY <sup>•</sup>                                                         | 370 |
|                    |     | ▲<br>n2990<br>G252E                                                                                                                                                                                                                                                  |     |
