# Supplementary material
Source: PubMed Central journal article supplement (PMC1636532)

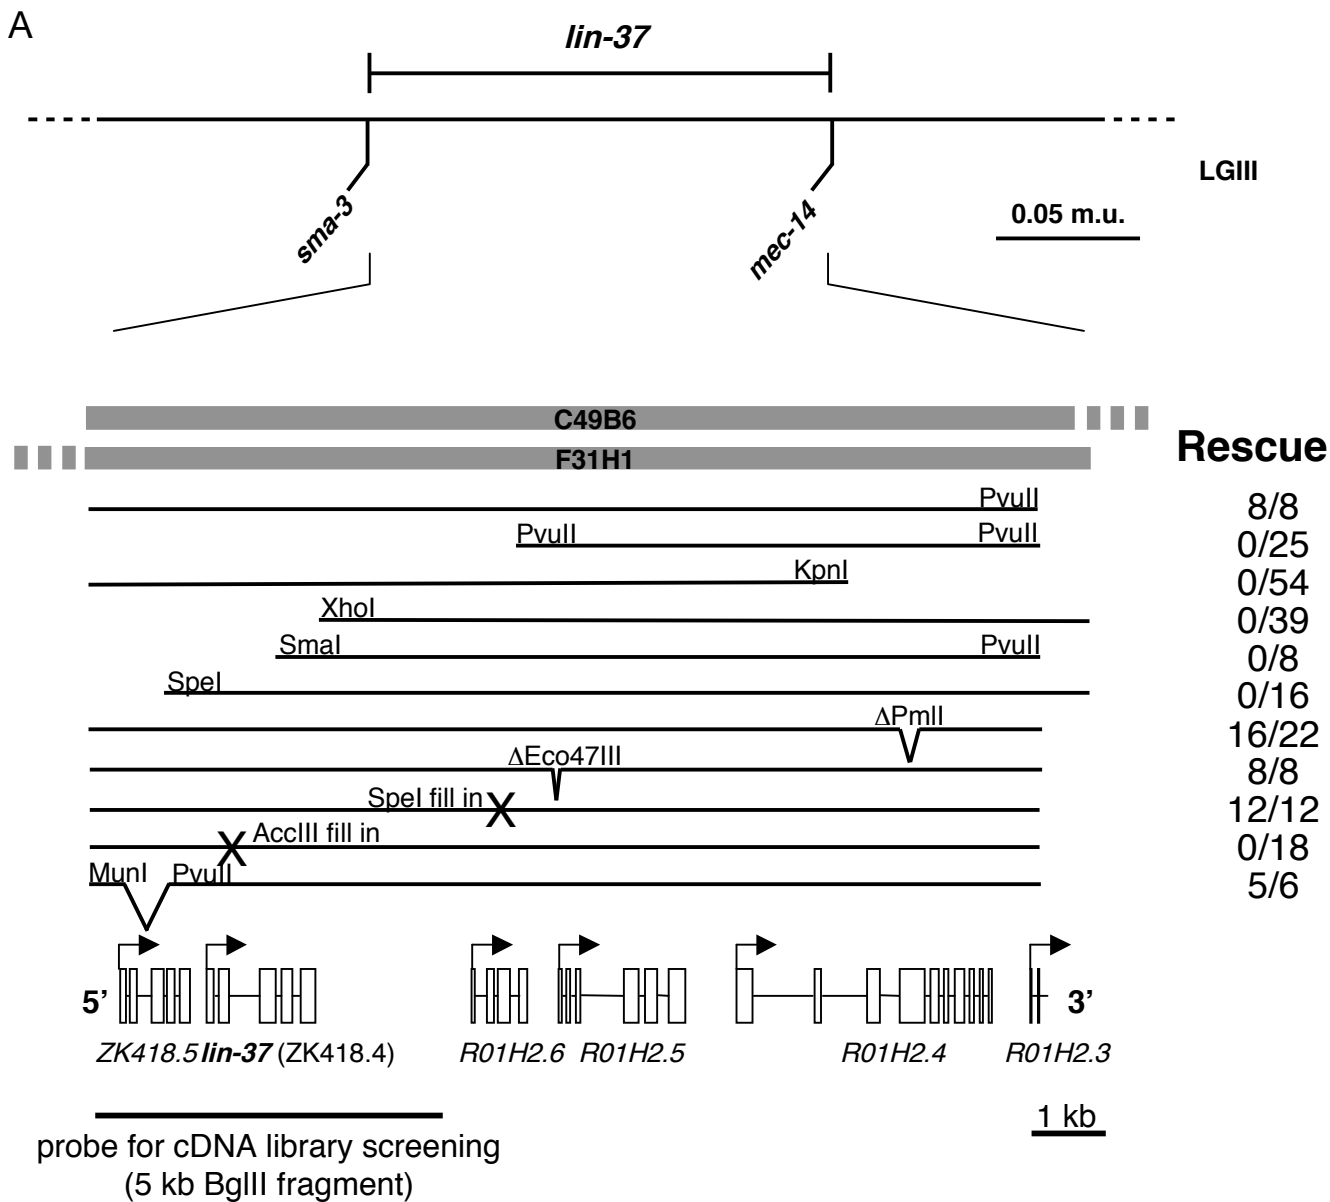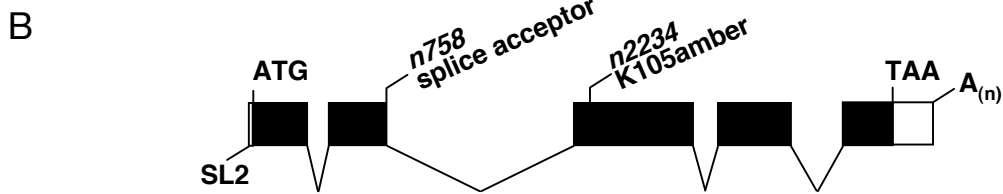

Supplement: pnas_0608461103_1.pdf [file pnas_0608461103_1.pdf]

IP $\alpha$ GFP

---

*lin-36::*  
*gfp* WT

IN IP IN IP

LIN-36::GFP

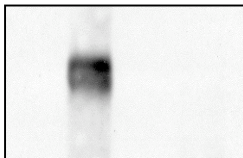

LIN-37

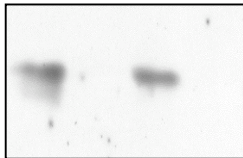

Supplement: pnas_0608461103_3.pdf [file pnas_0608461103_3.pdf]

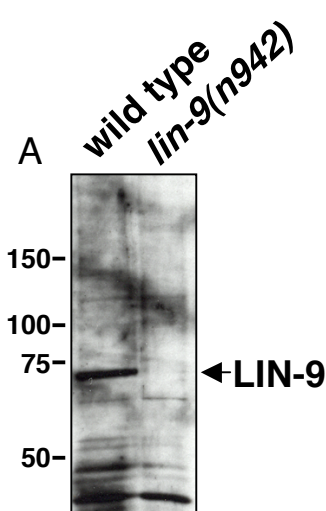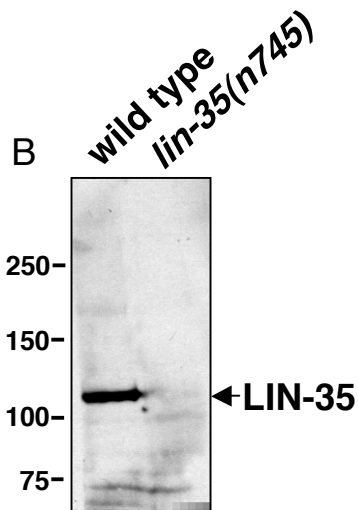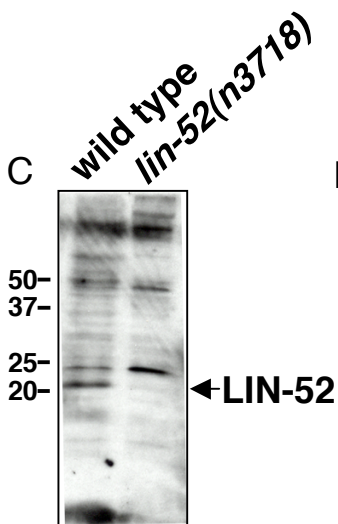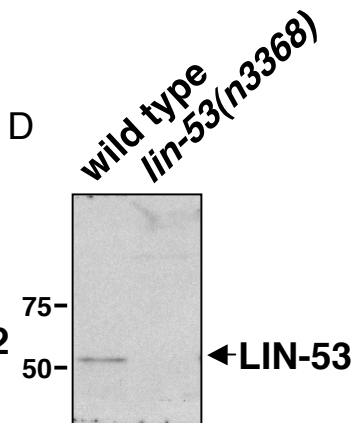

Supplement: pnas_0608461103_4.pdf [file pnas_0608461103_4.pdf]
